# Supplementary material
Source: HighWire-hosted journal article supplement (http://www.jrheum.org/highwire/filestream/29818/field_highwire_adjunct_files/0/160001DataSuppl.pdf)

## ONLINE SUPPLEMENTARY DATA

**Supplementary Table 1.** Data sources from the Osteoarthritis Initiative.

| OAI dataset             | Version number |
|-------------------------|----------------|
| Enrolees                | 20             |
| Subject characteristics | 0.2.2          |
| Physical exam           |                |
| Baseline                | 0.2.2          |
| 1 year                  | 1.1.2          |
| 2 years                 | 3.1.1          |
| 3 years                 | 5.2.1          |
| 4 years                 | 6.2.1          |
| Medical history         |                |
| Baseline                | 0.2.2          |
| 1 year                  | 1.2.1          |
| 2 years                 | 3.2.1          |
| 3 years                 | 5.2.1          |
| 4 years                 | 6.2.1          |
| Joint symptoms          |                |
| Baseline                | 0.2.2          |
| Year 1                  | 1.2.1          |
| Year 2                  | 3.2.1          |
| Year 3                  | 5.2.1          |
| Year 4                  | 6.2.1          |
| Outcomes                | 5              |

**Supplementary Figure 1.** Knee pain predicting new shoulder pain: mediated by leg weakness.

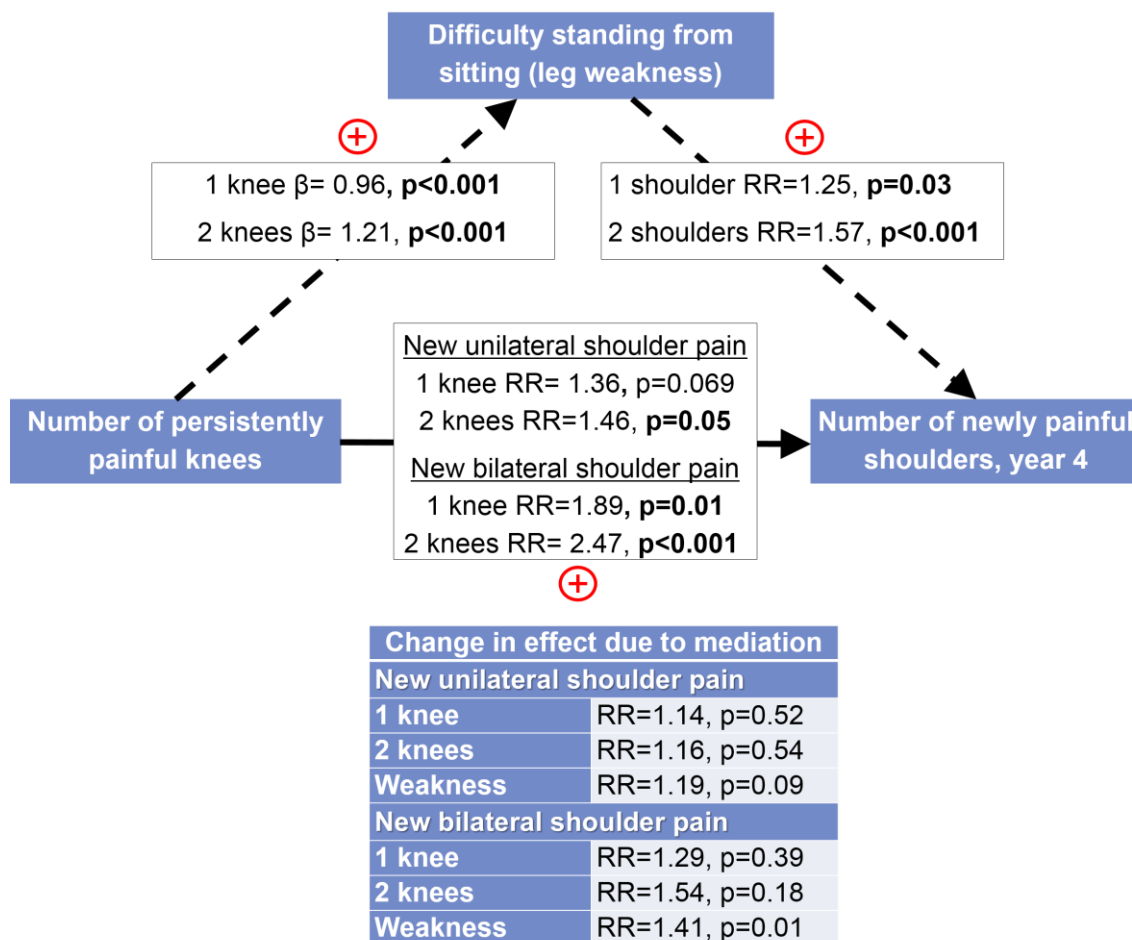

Supplement: 160001DataSuppl.pdf [file 160001DataSuppl.pdf]
